1 Title: Autism spectrum disorder common variants associated with regional lobe volume variations at  
2 birth: cross-sectional study in 273 European term neonates in developing Human Connectome Project  
3 Running title: Autism risk linked with early brain volumes.

4 Hai Le MRes<sup>1\*</sup>, Daphna Fenchel PhD<sup>1</sup>, Konstantina Dimitrakopoulou PhD<sup>2</sup>, Hamel Patel PhD<sup>3</sup>, Charles  
5 Curtis MRes<sup>3,4</sup>, Lucilio Cordero-Grande PhD<sup>1,5</sup>, A. David Edwards DSc<sup>1</sup>, Joseph Hajnal PhD<sup>1</sup>, Jacques-  
6 Donald Tournier PhD<sup>1</sup>, Maria Deprez PhD<sup>1</sup> & Harriet Cullen PhD<sup>1,6</sup>

7 <sup>1</sup> *Centre for the Developing Brain, Perinatal Imaging and Health Department, King's College London,*  
8 *London, United Kingdom*

9 <sup>2</sup> *Translational Bioinformatics Platform, NIHR Biomedical Research Centre, Guy's and St. Thomas' NHS*  
10 *Foundation Trust and King's College London, London, United Kingdom*

11 <sup>3</sup> *NIHR BioResource Centre Maudsley, NIHR Maudsley Biomedical Research Centre at South London and*  
12 *Maudsley NHS Foundation Trust & Institute of Psychiatry, Psychology and Neuroscience, King's College*  
13 *London, London, United Kingdom*

14 <sup>4</sup> *Social Genetic & Developmental Psychiatry Centre, Institute of Psychiatry, Psychology and*  
15 *Neuroscience, King's College London, London, United Kingdom*

16 <sup>5</sup> *Biomedical Image Technologies, ETSI Telecomunicación, Universidad Politécnica de Madrid & CIBER-*  
17 *BBN, ISCIII, Madrid, Spain*

18 <sup>6</sup> *Department of Medical and Molecular Genetics, King's College London, London, United Kingdom*

19 \* Correspondence: [Le.hai@kcl.ac.uk](mailto:Le.hai@kcl.ac.uk) / 1<sup>st</sup> Floor, South Wing, St. Thomas' Hospital, London SE1 7EH, UK

## 20 **Abstract**

21 Increasing lines of evidence suggest cerebral overgrowth in autism spectrum disorder (ASD) children in  
22 early life, but few studies have examined the effect of ASD common genetic variants on brain volumes in  
23 a general paediatric population. This study examined the association between ASD polygenic risk score  
24 (PRS) and volumes of the frontal, temporal, parietal, occipital, fronto-temporal and parieto-occipital  
25 lobes in 273 term-born infants of European ancestry in the developing Human Connectome Project. ASD  
26 PRS was positively associated with frontal ( $\beta = 0.027$ ,  $p_{FDR} = 0.04$ ) and fronto-temporal ( $\beta = 0.024$ ,  $p_{FDR} =$   
27  $0.01$ ) volumes, but negatively with parietal ( $\beta = -0.037$ ,  $p_{FDR} = 0.04$ ) and parieto-occipital ( $\beta = -0.033$ ,  $p_{FDR}$   
28  $= 0.01$ ) volumes. This preliminary result suggests potential involvement of ASD common genetic variants  
29 in early structural variations linked to ASD.

## 30 **1. Introduction:**

31 Early neuroanatomical differences have been associated with autism spectrum disorder (ASD) <sup>1</sup>,  
32 but the role of ASD common genetic variants on normal brain development in neonates remains  
33 unclear. Preliminary examination of additive effects of the single nucleotide polymorphisms (SNPs) as  
34 measured by polygenic risk scores (PRS) has suggested links between ASD polygenic risk and structural  
35 abnormalities in young children. Recently, in two general paediatric populations between 9-11 and 3-14  
36 years of age, findings revealed associations between ASD PRS and regional cortical thickness <sup>2</sup> and  
37 gyrification <sup>3</sup>. Despite small effect sizes, these results demonstrate possible brain morphological  
38 alterations associated with ASD common genetic variants.

39 Increasing lines of evidence suggest early brain structural variations are likely to precede ASD  
40 diagnosis and can be detected in the first two years of life <sup>4</sup>. For instance, greater extra-axial cerebral  
41 spinal fluid <sup>5</sup>, hyper-expansion of cortical surface area <sup>1</sup>, and ventriculomegaly <sup>6</sup> can be found in infants  
42 with ASD or at high familial risk of the disease as early as six months after birth. Similarly, total brain

43 tissue and regional lobe volumes appear larger in ASD cases between two to four years old as compared  
44 with controls<sup>7-9</sup>. Further evidence suggests these regional lobe volume variations may not be consistent  
45 throughout the cerebrum and that frontal and temporal lobes are relatively more affected than parietal  
46 and occipital lobes<sup>10-13</sup>. Taken together, this points toward possible disruption to the normal  
47 neurodevelopmental process (i.e., from primary to more complex functions) in the disease<sup>14</sup>.

48 Common genetic variants appear to explain at least 12% of the heritability of ASD<sup>15</sup>. Functional  
49 annotation of the genetic loci revealed an enrichment in genes particularly important during fetal  
50 corticogenesis<sup>15,16</sup>. Similarly, recent transcriptomic analysis of postmortem ASD tissues spanning across  
51 four cortical lobes found evidence of variable changes in genetic expression of ASD risk genes along the  
52 anterior-posterior axis<sup>17</sup> reflecting possible alterations to fundamental elements of cortical organisation  
53 in the disease. Concurrently, the neonatal brain is most rapidly changing immediately after birth<sup>18,19</sup>.  
54 The first two postnatal years are characterised by dynamic, regionally non-uniform and protracted brain  
55 growth<sup>18</sup>. Disruption to normal development during this critical window as a result of either genetic or  
56 environmental factors may have long lasting effects on brain structure and function<sup>20</sup>.

57 Given the evidence of regional lobe volume variations associated with the disease and possible  
58 involvement of ASD risk genes in early neurodevelopmental process<sup>15,17</sup>, the current work aimed to the  
59 examine the association between ASD common variants and regional lobe volumes in the general  
60 population at birth.

## 61 **2. Methods:**

## 62 **2.1. Cohort**

63 The data used were analysed from infants, who were recruited from St. Thomas' Hospital  
64 London, UK as part of the third release of developing Human Connectome Project (dHCP)  
65 (<https://biomedica.github.io/dHCP-release-notes/>)<sup>21</sup>. The dHCP was conducted according to the  
66 principles of the Declaration of Helsinki and ethical approval was given from the UK National Research  
67 Ethics Service. Written parental consent was provided for all subjects.

### 68 **2.1.1 Genotyping and genetic quality control**

69 The genetic data quality control and preprocessing steps used in this study are described in<sup>22</sup>.  
70 Briefly, of the 842 saliva samples, genotype data were collected (Oragene DNA OG-250 kit) and  
71 genotyped for SNPs genome-wide on the Illumina Infinium Omni5-4 v1.2 array. If multiple samples  
72 were provided, only one per individual was retained for analysis (randomly chosen). Excluded were also  
73 genotyped data based on the following criteria: completeness less than 95%, gender discrepancy and  
74 genotyping failure of more than 1% of the SNPs. If the relatedness score between any individual pair  
75 was above a cut-off ( $\pi_{\text{hat}} \geq 0.1875$ ), only one sample was randomly retained. Finally, SNPs were  
76 filtered based on the following criteria: being non-autosomal, having minor allele frequency less than  
77 0.05, missing in more than 1% of individuals or deviating from Hardy-Weinberg equilibrium with a p-  
78 value  $< 1 \times 10^{-5}$ . This resulted in a sample of 754 individuals with high-quality genetic data.

## 79 **2.2. Data pre-processing**

80 Given the strong effect of prematurity on the imaging phenotype, out of 887 available imaging  
81 scans, only those of term-born infants (born after at least 37 weeks of gestational age (GA)) were  
82 selected for analysis (n=582 scans). Briefly, infants brain scans were obtained during their natural sleep  
83 using a dedicated neonatal brain imaging system on a 3T Philips Achieva scanner<sup>23</sup>. Here, T2-weighted  
84 MRI were acquired using a TSE sequence with parameters TR = 12 s, TE = 156 ms, and resolution (mm)

85 0.8 x 0.8 x 1.6. A series of motion correction<sup>24</sup> and super-resolution reconstruction<sup>25</sup> techniques were  
86 then employed to produce images of resolution (mm) 0.5 x 0.5 x 0.5. Subsequently, the T2 images were  
87 segmented with the DrawEM neonatal segmentation algorithm (<https://github.com/MIRTK/DrawEM>)<sup>26</sup>.  
88 This technique utilized spatial priors of 50 brain regions in the form of 20 manually segmented atlases<sup>27</sup>  
89 in combination with tissue segmentation using an Expectation-Maximisation technique to model  
90 intensities of different tissues classes and their subdivisions. This allowed the images to be accurately  
91 parcellated into 87 regions (Figure 1A). The quality control was performed as a part of dHCP minimal  
92 processing pipeline<sup>28</sup>. The absolute volumes of each structure were calculated as the total number of  
93 voxels multiplied by the voxel dimension<sup>29</sup>. Images with radiology score of 5 (i.e, major brain lesions)  
94 denoted by clinical experts were excluded (26 scans removed). Finally, of the duplicate scans, the first  
95 imaging session was retained (2 scans removed).

### 96 **2.2.1 Volumetric data**

97 From the original 87 segmented regions, the cortical grey and white matter regions that made  
98 up the frontal, temporal, occipital and parietal lobes were selected in accordance with previous studies  
99<sup>13,30</sup>. Here, the total grey and white matter volumes in both hemispheres of six brain regions – frontal,  
100 temporal, occipital, parietal, fronto-temporal and parieto-occipital were calculated. In addition, the  
101 brain volumes of the superior temporal gyrus (middle and posterior part), the inferior temporal gyri  
102 (anterior and posterior part) and the anterior temporal lobe (medial and lateral part) were summed up  
103 to designate the temporal lobe. The lateral occipitotemporal gyrus and gyrus fusiform (posterior and  
104 anterior part) were included in the volume of the occipital lobe (Figure 1B). The total brain tissue volume  
105 (TBV) was computed as the sum of the volumes of cortical white and grey matter, deep grey matter,  
106 cerebellum and brainstem.

### 107 **2.2.2 Populations stratification**

108 Ancestry subpopulations were identified by merging our cohort of 754 infants with 2504  
109 individuals from the 1000 Genomes Project<sup>31</sup> using a subset of common autosomal SNPs. Principal  
110 component analysis (PCA) was then performed on the resulting genetic dataset with PLINK and principal  
111 components (PCs) generated were plotted to visually assign individuals to ancestral subgroups. Since the  
112 discovery sample used in the genome-wide association study included exclusively Danish individuals,  
113 only infants of European ancestry were chosen for the ongoing analysis. Here, 429 (57%) infants were  
114 determined to have European ancestry.

115 European ancestry PCs were derived from the genetic data of the 429 infants using PCA, and  
116 visual examination of the PC pairwise scatterplots was carried out to exclude European ancestral group  
117 outliers (6 individuals excluded). Finally, of the remaining infants of European ancestry, 273 were born  
118 at term and examined in this study (Table 1; Figure 2).

### 119 **2.2.3 Polygenic risk score**

120 The summary statistics used to determine individual PRS were derived from the largest to date  
121 ASD GWAS<sup>15</sup>. This analysis was performed on 18 381 individuals with ASD and 27 969 controls from a  
122 unique Danish population<sup>32</sup>. PRS for each dHCP infant were estimated using PRSice-2 at 10 different p-  
123 value thresholds ( $P_T$ ):  $10^{-8}$ ,  $10^{-6}$ ,  $10^{-5}$ , 0.0001, 0.001, 0.01, 0.05, 0.1, 0.5, and 1, such that each score was  
124 composed of only those SNPs with ASD GWAS association p-value less than the respective threshold.  
125 Genotype data of European individuals in the 1000 Genomes project was used as the external linkage  
126 disequilibrium reference panel<sup>31</sup>. PCA was then carried out on all 10 raw PRS values to obtain the first  
127 principal component (PRS-PC1)<sup>33</sup>. In accordance with several genetic-neuroimaging studies, this  
128 unsupervised approach was selected due to its ease of implementation and reduction of multiple testing  
129 without loss of power<sup>34-36</sup>. In the present study, PRS-PC1 explained 44% of the total variance in PRS  
130 scores and was positively associated with PRS at all  $P_T$  (Supplementary Figure 1).

131 **2.3. Statistical Analysis**

132

133 For each of the 6 dependent variables of interest (frontal, temporal, occipital, parietal, fronto-  
134 temporal, parieto-occipital lobe volumes), a linear regression was performed with PRS-PC1 as the  
135 independent variable, and the first 3 European ancestry PC, GA, postmenstrual age at scan (PMA), sex  
136 and TBV as covariates (i.e.,  $\text{Volume} = \text{PRS-PC1} + \text{Ancestry} + \text{GA} + \text{PMA} + \text{Sex} + \text{TBV}$ ). The multiple-testing  
137 correction was carried out using false discovery rate (FDR) method. Results with  $p\text{-value}_{\text{FDR}} < 0.05$  were  
138 considered statistically significant.

139 Given our relatively small cohort, the results were further examined using three additional  
140 stability tests. Firstly, the sample was randomly divided into 2 data sets. PCA of the PRS and subsequent  
141 regression analysis described above were carried out on both data sets separately, the results of which  
142 were then compared. Here, the result was considered consistent if both sets yielded associations  
143 reported in the primary analysis. This test was repeated 1000 times using different random splits.  
144 Secondly, brain volume of the top and bottom 20% of the PRS distribution at each  $P_T$  were compared  
145 using t-tests. Thirdly, regression analysis described above was performed with each of the 10  $P_T$  instead  
146 of PRS-PC1.

147 **2.4. Exploratory gene-set enrichment analysis**

148 To further examine if ASD common genetic variants most associated with lobe volumes  
149 converged on relevant biological pathways, exploratory gene-set enrichment analysis was carried out.  
150 Here, linear regression was performed for each SNP ( $\text{Volume} \sim \text{GA} + \text{PMA} + \text{TBV} + \text{Risk allele frequency} +$   
151  $\text{sex} + \text{ancestry PCs}$ ) to determine its effect on fronto-temporal and parieto-occipital lobe volumes.  
152 Subsequently, only the SNPs nominally associated with the imaging phenotypes were considered for  
153 further analysis ( $p < 0.01$ ). Here, three SNP subsets were examined: SNPs associated with only fronto-

154 temporal lobe volume, SNPs associated with only parieto-occipital lobe volume, and SNPs associated  
155 with both volumes. To determine if elements in each SNPs subset converged on relevant biological  
156 pathways, genes containing those SNPs were probed for their functions. Here, a gene was selected if it  
157 contained the SNP of interest within its start and stop coordinates according to the human genome  
158 build 37 (<https://ctg.cncr.nl/software/magma>). Thus, for each SNPs subset, a corresponding gene list  
159 was created. Each gene list was then functionally tested against a curated database of 13 159 gene sets  
160 (pathways) obtained from MSigDB v.7.5.1 (curated canonical pathways from Reactome, KEGG,  
161 Wikipathways and Gene Ontology; <https://www.gsea-msigdb.org/gsea/msigdb/>). For each pathway, the  
162 hypergeometric test was used to determine the probability of randomly observing the set of genes in  
163 the gene list<sup>37</sup>. This analysis was performed using GENE2FUNC on FUMA platform<sup>38</sup> with 19427 genes  
164 from human genome Build 37 as background genes. Pathways with adjusted Bonferroni p-value < 1.26 x  
165 10<sup>-6</sup> (i.e, 0.05/(13159 pathways \*3 gene lists)) and containing at least 4 overlapping genes with the gene  
166 list were considered enriched. Finally, to ensure consistency and reproducibility of the results, two  
167 additional stability tests were carried out for each gene list. In the first test, we randomly sampled  $n$   
168 SNPs (where  $n$  is the number of SNPs found in each SNPs subset), generated the corresponding gene list,  
169 and applied the hypergeometric method described above. This test was simulated 1000 times, and the  
170 most enriched pathway in each run was recorded. Gene sets specific to the phenotype of interest were  
171 those that were found across fewer than 5% of all random experiments. In the second test, we repeated  
172 the enrichment analysis of the gene lists with other similar bioinformatic tools, including DAVID v.2021  
173 (<http://david.abcc.ncifcrf.gov/>)<sup>37,39</sup> and WebGestalt v. 2019 (<http://www.webgestalt.org/#>)<sup>40</sup> to confirm  
174 the FUMA findings.

### 175 **3. Results**

176 *3.1 Higher ASD PRS associated with greater fronto-temporal volume but lower parieto-occipital volumes.*



177 We found statistically significant associations between frontal ( $\beta = 0.027$ ,  $p_{FDR} = 0.04$ ), parietal ( $\beta$   
178  $= -0.037$ ,  $p_{FDR} = 0.04$ ), fronto-temporal ( $\beta = 0.024$ ,  $p_{FDR} = 0.01$ ), and parieto-occipital lobe ( $\beta = -0.033$ ,  $p_{FDR}$   
179  $= 0.01$ ) volumes and PRS-PC1 (Figure 3). Here, higher PRS-PC1 was associated with higher frontal and  
180 fronto-temporal volumes, but lower parietal and parieto-occipital volumes. Performing stability tests by  
181 halving or comparing the top and bottom extremes of different PRS  $P_T$  distributions showed consistent  
182 direction of association in the reported brain regions (Supplementary Figure 2 and Supplementary  
183 Figure 3). Finally, consistent patterns of associations were also observed when considering all 10 PRS  $P_T$   
184 values (Supplementary Figure 4).

### 185 *3.2 Enrichment in pathways related to neuron differentiation and synaptic membrane.*

186 From the 116 433 SNPs examined in this study, three unique SNPs subsets and their  
187 corresponding gene lists associated with fronto-temporal volume, parieto-occipital volume, or both  
188 were generated (Figure 4A). Overrepresentation analyses of the three gene lists identified enrichment in  
189 several gene-ontology biological processes and cellular components (Supplementary Table 1). Retaining  
190 only the significant pathways found in less than 5% of times across all random simulations revealed 2  
191 gene sets, synaptic membrane (Gene Ontology (GO) cellular component, GO: 0097060;  $p=9.5 \times 10^{-7}$ ) and  
192 neuron differentiation (GO biological process, GO: 0030182,  $p=7.6 \times 10^{-7}$ ). Finally, gene sets enriched for  
193 similar functions were also found using both DAVID and WebGestalt tools (Supplementary Table 2 and  
194 3).

## 195 **4. Discussion**

196 We identified an association between ASD common genetic variants and regional brain lobe  
197 volumes in a cohort of term-born infants at birth. Here, we reported a positive association between  
198 fronto-temporal brain volume and ASD risk, but negative association of parieto-occipital brain volume  
199 and ASD risk. These results show measurable differences in brain volume associated with ASD risk prior

200 to the onset of disease. In addition, exploratory gene set enrichment analysis of the ASD common  
201 variants most associated with the examined neuroimaging phenotypes suggested possible widespread  
202 disruption to normal early development processes.

#### 203 *4.1. Comparison with previous examination of ASD related structural variations.*

204 To our knowledge, this is the first study to examine the association of ASD common genetic  
205 variants with regional brain lobe volumes in a general population at birth. Previously, in two similar but  
206 larger cohorts of children between 3-14 and 9-12 years of age, ASD PRS has been significantly associated  
207 with cortical thickness of precentral and postcentral gyri<sup>2</sup> and nominally (i.e., did not survive multiple  
208 testing correction) associated with superior parietal gyrification<sup>41</sup>. Taken together, these studies suggest  
209 that ASD common genetic variants may be involved in early structural brain changes.

210 Evidence of abnormal cortical surface area expansion has been observed in infants with a high-  
211 familial risk of ASD in the first year of life<sup>1</sup>. In retrospective studies of ASD children, this surface area  
212 enlargement appeared to relate to cerebral brain volume increase in ASD children between 2 to 4 years  
213 old<sup>1,13</sup>. In both examination of cortical surface area and cerebral lobe volumes, there appeared to be  
214 regional variability associated with the disease. This study provides additional evidence for regional  
215 brain volume differences associated with ASD PRS measurable as early as birth. While it is not yet known  
216 whether such brain structural changes persist in adolescence and adulthood<sup>42</sup>, a recent longitudinal  
217 study of ASD cases versus controls between 2 and 13 years of age found that early cerebral enlargement  
218 was maintained until middle childhood with no evidence of normalisation or regression<sup>9</sup>.

219 Greater frontal and fronto-temporal volume in association with greater ASD risk is in line with  
220 existing brain imaging studies<sup>43</sup>. Evaluation of postmortem prefrontal cortices has suggested this may  
221 be driven by abnormally excess number of neurons in ASD children compared with that in controls<sup>44</sup>.  
222 However, to our knowledge, no studies to date have identified reduced brain volume either in

223 individuals with ASD or in association with ASD risk. While the magnitude of cerebral hyperplasia  
224 appears to vary across regions, with frontal and temporal lobes being more affected than the parietal  
225 and occipital lobes<sup>30</sup>, our result of reduced parietal and occipital lobe volumes have not yet been  
226 reported. Given that previous exploration of ASD PRS has focused on total brain volume and global grey  
227 and white matter<sup>41,45</sup>, we could not draw comparison with our current result. Interestingly, recent  
228 transcriptomic analysis of postmortem ASD brain tissues across four cortical lobes similarly found  
229 evidence of variability in expression of risk genes along the antero-posterior axis<sup>17</sup>. Taken together, this  
230 suggests pathophysiology of the disease may involve disruption to normal neuro-patterning process.  
231 Concurrently, the current study reported a consistent pattern of opposite directions of effect related to  
232 ASD common variants between fronto-temporal and parieto-occipital regions.

233

#### 234 *4.2 Clinical relevance of neuroimaging observations with pathophysiology of ASD*

235 While the pathophysiology of ASD likely begins prenatally, the evidence suggests that subtle  
236 ASD-traits emerge during the latter part of the first and second years in high-risk infants who later  
237 develop the disease<sup>46</sup>. For instance, at 6 months, high-risk infants exhibit differences in gross motor and  
238 visual reception skills<sup>47</sup>. Interestingly, recent studies also found significant association between ASD PRS  
239 and motor and language scores in general infant populations at 18 months<sup>48,49</sup>, raising the possibility of  
240 partial contributions by ASD common variants on related ASD-traits. However, the current consensus is  
241 that ASD-defining features likely become pronounced only after the second year and consolidate around  
242 the fourth year, which co-occur with the regional brain volume overgrowth<sup>46</sup>. Indeed, disruptions to the  
243 regions examined in this study have been implicated in reduced social and language functions and  
244 repetitive or stereotyped behaviours of ASD<sup>50</sup>. Nevertheless, the direction and effect of association  
245 between regional brain lobe volumes, ASD symptoms and ASD common variants remain largely unclear

246 and future investigation into this interplay in early life may provide important insights into the  
247 pathophysiology of the disease.

#### 248 *4.3 Exploratory gene set enrichment analysis*

249 By selecting the ASD common variants that were associated with fronto-temporal and parieto-  
250 occipital volumes, we found enriched neurodevelopmental processes. However, this is expected since  
251 ASD common variants are likely found in genes primarily involved in corticogenesis and with highest  
252 expression during the prenatal period<sup>15</sup>. In addition, we have previously identified regional brain  
253 volume variations associated with schizophrenia PRS in the same cohort of infants<sup>51</sup>. Together, these  
254 preliminary results support the notion that many psychiatric disorders may have neurodevelopmental  
255 origin and may be associated with brain structural variations before the average age of the disease  
256 diagnosis<sup>20</sup>.

257 Dysregulation of multiple aspects of synaptic function and neuron development have been  
258 implicated in the disease. For instance, combinations of abnormal synaptogenesis (e.g. due to mutations  
259 in core regulators of synaptic architectures) and synaptic pruning (e.g., defects in neuronal autophagy)  
260 have been proposed to lead to increased density of dendritic spines in ASD patients<sup>52</sup>. Similarly,  
261 abnormalities in the control of neuronal cell differentiation may give rise to accelerated neuronal cell  
262 growth observed in ASD<sup>53</sup>.

#### 263 *4.4. Limitations*

264 The main limitation of our study is the small sample size and simplicity of PRS. Therefore,  
265 findings presented here must be considered preliminary, and confirmation in independent samples is  
266 important. Here, only term-born infants of European ancestry were considered. This was firstly due to  
267 the known impacts of prematurity on the brain structures and secondly due to exclusive inclusion of  
268 Danish population in the discovery GWAS sample. In line with the latest schizophrenia GWAS<sup>54</sup>, future

269 inclusion of different ancestral groups in the ASD GWAS may improve generalisability of the PRS. Finally,  
270 while overrepresentation analyses must be considered exploratory, as the analyses are biased toward  
271 larger well-studied processes<sup>37</sup>, they may still provide relevant targets for future investigation.

## 272 5. Conclusion

273 In summary, our study reports positive associations between the ASD PRS with the frontal and  
274 fronto-temporal volumes, but negative with the parietal and parieto-occipital volumes in a cohort of  
275 term neonates. Whilst preliminary, the result contributes to the examination of the pathophysiology of  
276 ASD and its early emergence.

## 277 Data availability

278 The MRI data used (dHCP third release) is freely available: [https://biomedica.github.io/dHCP-release-](https://biomedica.github.io/dHCP-release-notes/)  
279 [notes/](https://biomedica.github.io/dHCP-release-notes/). The described statistical analysis can be recreated using the IPython notebook  
280 [https://github.com/lehai-](https://github.com/lehai-ml/dHCP_genetics/blob/main/notebook_results/asd/Supplementary_notebook.ipynb)  
281 [ml/dHCP\\_genetics/blob/main/notebook\\_results/asd/Supplementary\\_notebook.ipynb](https://github.com/lehai-ml/dHCP_genetics/blob/main/notebook_results/asd/Supplementary_notebook.ipynb). Scripts used for  
282 visualising results in this study is available here: <https://github.com/lehai-ml/nimagen>.

## 283 Acknowledgements

284 Data were provided by the developing Human Connectome Project, KCL-Imperial-Oxford Consortium  
285 and the work was funded by ERC grant agreement no. 319456, the Wellcome EPSRC Centre for Medical  
286 Engineering at Kings College London (WT 203148/Z/16/Z) and by the National Institute for Health  
287 Research (NIHR) Biomedical Research Centre based at Guy's and St Thomas' NHS Foundation Trust and  
288 King's College London. The views expressed are those of the authors and not necessarily those of the  
289 NHS, the National Institute for Health Research or the Department of Health. The funders had no role in  
290 the design and conduct of the study; collection, management, analysis, and interpretation of the data;

291 preparation, review, or approval of the manuscript; and decision to submit the manuscript for  
292 publication. We are grateful to the families who generously supported this trial.

293 HL is supported by the UK Medical Research Council (MR/N013700/1) and King's College London  
294 member of the MRC Doctoral Training Partnership in Biomedical Sciences.

295 HC is an academic clinical lecturer in Clinical Genetics at Kings College London and is supported by the  
296 NIHR. LCG received support from the Comunidad de Madrid-Spain Support for R&D Projects  
297 [BGP18/00178].

298 The authors acknowledge use of the research computing facility at King's College London, Rosalind  
299 (<https://rosalind.kcl.ac.uk>).

### 300 **Conflict of interest**

301 Authors declare no conflict of interest or any competing financial interest in relation to the work  
302 described.

303

304

305

- 306 1 Hazlett HC, Gu H, Munsell BC, Kim SH, Styner M, Wolff JJ *et al.* Early brain development in infants  
307 at high risk for autism spectrum disorder. *Nature* 2017; **542**: 348–351.
- 308 2 Khundrakpam B, Vainik U, Gong J, Al-Sharif N, Bhutani N, Kiar G *et al.* Neural correlates of  
309 polygenic risk score for autism spectrum disorders in general population. *Brain Commun*  
310 doi:10.1093/BRAINCOMMS/FCAA092 (2020)
- 311 3 Alemany S, Jansen PR, Muetzel RL, Marques N, El Marroun H, Jaddoe VWV *et al.* Common  
312 Polygenic Variations for Psychiatric Disorders and Cognition in Relation to Brain Morphology in  
313 the General Pediatric Population. *J Am Acad Child Adolesc Psychiatry* 2019; **58**: 600–607.
- 314 4 Schumann CM, Bloss CS, Barnes CC, Wideman GM, Carper RA, Akshoomoff N *et al.* Longitudinal  
315 magnetic resonance imaging study of cortical development through early childhood in autism.  
316 *Journal of Neuroscience* 2010; **30**: 4419–4427.
- 317 5 Shen MD, Nordahl CW, Li DD, Lee A, Angkustsiri K, Emerson RW *et al.* Extra-axial cerebrospinal  
318 fluid in high-risk and normal-risk children with autism aged 2–4 years: a case-control study.  
319 *Lancet Psychiatry* 2018; **5**: 895–904.
- 320 6 Kyriakopoulou V, Davidson A, Chew A, Gupta N, Arichi T, Nosarti C *et al.* Characterisation of ASD  
321 traits among a cohort of children with isolated fetal ventriculomegaly. *Nat Commun* 2023; **14**: 1–  
322 10.
- 323 7 Courchesne E, Carper R, Akshoomoff N. Evidence of Brain Overgrowth in the First Year of Life in  
324 Autism. *JAMA* 2003; **290**: 337–344.
- 325 8 Hazlett HC, Poe M, Gerig G, Smith RG, Provenzale J, Ross A *et al.* Magnetic Resonance Imaging  
326 and Head Circumference Study of Brain Size in Autism: Birth Through Age 2 Years. *Arch Gen*  
327 *Psychiatry* 2005; **62**: 1366–1376.
- 328 9 Lee JK, Andrews DS, Ozonoff S, Solomon M, Rogers S, Amaral DG *et al.* Longitudinal Evaluation of  
329 Cerebral Growth Across Childhood in Boys and Girls With Autism Spectrum Disorder. *Biol*  
330 *Psychiatry* 2021; **90**: 286–294.
- 331 10 Carper RA, Courchesne E. Localized enlargement of the frontal cortex in early autism. *Biol*  
332 *Psychiatry* 2005; **57**: 126–133.
- 333 11 Bloss CS, Courchesne E. MRI neuroanatomy in young girls with autism: A preliminary study. *J Am*  
334 *Acad Child Adolesc Psychiatry* 2007; **46**: 515–523.
- 335 12 Kates WR, Burnette CP, Eliez S, Strunge LA, Kaplan D, Landa R *et al.* Neuroanatomic Variation in  
336 Monozygotic Twin Pairs Discordant for the Narrow Phenotype for Autism. *American Journal of*  
337 *Psychiatry* 2004; **161**: 539–546.
- 338 13 Hazlett HC, Poe MD, Gerig G, Styner M, Chappell C, Smith RG *et al.* Early Brain Overgrowth in  
339 Autism Associated With an Increase in Cortical Surface Area Before Age 2 Years. *Arch Gen*  
340 *Psychiatry* 2011; **68**: 467–476.

- 341 14 Gogtay N, Giedd JN, Lusk L, Hayashi KM, Greenstein D, Vaituzis AC *et al.* Dynamic mapping of  
342 human cortical development during childhood through early adulthood. *Proc Natl Acad Sci U S A*  
343 2004; **101**: 8174–8179.
- 344 15 Grove J, Ripke S, Als TD, Mattheisen M, Walters RK, Won H *et al.* Identification of common  
345 genetic risk variants for autism spectrum disorder. *Nat Genet* 2019; **51**: 431–444.
- 346 16 Parikshak NN, Luo R, Zhang A, Won H, Lowe JK, Chandran V *et al.* Integrative functional genomic  
347 analyses implicate specific molecular pathways and circuits in autism. *Cell* 2013; **155**: 1008.
- 348 17 Gandal MJ, Haney JR, Wamsley B, Yap CX, Parhami S, Emani PS *et al.* Broad transcriptomic  
349 dysregulation occurs across the cerebral cortex in ASD. *Nature* 2022; **611**: 532–539.
- 350 18 Holland D, Chang L, Ernst TM, Curran M, Buchthal SD, Alicata D *et al.* Structural growth  
351 trajectories and rates of change in the first 3 months of infant brain development. *JAMA Neurol*  
352 2014; **71**: 1266–1274.
- 353 19 Knickmeyer RC, Gouttard S, Kang C, Evans D, Wilber K, Smith JK *et al.* A structural MRI study of  
354 human brain development from birth to 2 years. *Journal of Neuroscience* 2008; **28**: 12176–12182.
- 355 20 Marín O. Developmental timing and critical windows for the treatment of psychiatric disorders.  
356 *Nat Med* 2016; **22**: 1229–1238.
- 357 21 Edwards AD, Rueckert D, Smith SM, Abo Seada S, Alansary A, Almalbis J *et al.* The Developing  
358 Human Connectome Project Neonatal Data Release. *Front Neurosci* 2022; **0**: 668.
- 359 22 Cullen H, Dimitrakopoulou K, Patel H, Curtis C, Bataille D, Gale-Grant O *et al.* Common Genetic  
360 Variation Important in Early Subcortical Brain Development. Preprint at  
361 <https://doi.org/10.1101/2022.08.11.22278677> (2022)
- 362 23 Hughes EJ, Winchman T, Padormo F, Teixeira R, Wurie J, Sharma M *et al.* A dedicated neonatal  
363 brain imaging system. *Magn Reson Med* 2017; **78**: 794–804.
- 364 24 Cordero-Grande L, Hughes EJ, Hutter J, Price AN, Hajnal J V. Three-dimensional motion corrected  
365 sensitivity encoding reconstruction for multi-shot multi-slice MRI: Application to neonatal brain  
366 imaging. *Magn Reson Med* 2018; **79**: 1365–1376.
- 367 25 Kuklisova-Murgasova M, Quaghebeur G, Rutherford MA, Hajnal J V., Schnabel JA. Reconstruction  
368 of fetal brain MRI with intensity matching and complete outlier removal. *Med Image Anal* 2012;  
369 **16**: 1550–1564.
- 370 26 Makropoulos A, Gousias IS, Ledig C, Aljabar P, Serag A, Hajnal J V. *et al.* Automatic whole brain  
371 MRI segmentation of the developing neonatal brain. *IEEE Trans Med Imaging* 2014; **33**: 1818–  
372 1831.
- 373 27 Gousias IS, Edwards AD, Rutherford MA, Counsell SJ, Hajnal J V., Rueckert D *et al.* Magnetic  
374 resonance imaging of the newborn brain: Manual segmentation of labelled atlases in term-born  
375 and preterm infants. *Neuroimage* 2012; **62**: 1499–1509.



- 376 28 Makropoulos A, Robinson EC, Schuh A, Wright R, Fitzgibbon S, Bozek J *et al.* The developing  
377 human connectome project: A minimal processing pipeline for neonatal cortical surface  
378 reconstruction. *Neuroimage* 2018; **173**: 88–112.
- 379 29 Makropoulos A, Aljabar P, Wright R, Hüning B, Merchant N, Arichi T *et al.* Regional growth and  
380 atlas of the developing human brain. *Neuroimage* 2016; **125**: 456–478.
- 381 30 Courchesne E, Pierce K, Schumann CM, Redcay E, Buckwalter JA, Kennedy DP *et al.* Mapping Early  
382 Brain Development in Autism. *Neuron* 2007; **56**: 399–413.
- 383 31 Auton A, Abecasis GR, Altshuler DM, Durbin RM, Bentley DR, Chakravarti A *et al.* A global  
384 reference for human genetic variation. *Nature* 2015; **526**: 68–74.
- 385 32 Pedersen CB, Bybjerg-Grauholm J, Pedersen MG, Grove J, Agerbo E, Bækvad-Hansen M *et al.* The  
386 iPSYCH2012 case-cohort sample: New directions for unravelling genetic and environmental  
387 architectures of severe mental disorders. *Mol Psychiatry* 2018; **23**: 6–14.
- 388 33 Coombes BJ, Ploner A, Bergen SE, Biernacka JM. A principal component approach to improve  
389 association testing with polygenic risk scores. *Genet Epidemiol* 2020; **44**: 676–686.
- 390 34 Bergen SE, Ploner A, Howrigan D, O'Donovan MC, Smoller JW, Sullivan PF *et al.* Joint  
391 contributions of rare copy number variants and common SNPs to risk for schizophrenia. *American*  
392 *Journal of Psychiatry* 2019; **176**: 29–35.
- 393 35 Alnæs D, Kaufmann T, Van Der Meer D, Córdova-Palomera A, Rokicki J, Moberget T *et al.* Brain  
394 Heterogeneity in Schizophrenia and Its Association With Polygenic Risk. *JAMA Psychiatry* 2019;  
395 **76**: 739–748.
- 396 36 Maglanoc LA, Kaufmann T, van der Meer D, Marquand AF, Wolfers T, Jonassen R *et al.* Brain  
397 Connectome Mapping of Complex Human Traits and Their Polygenic Architecture Using Machine  
398 Learning. *Biol Psychiatry* 2020; **87**: 717–726.
- 399 37 Huang DW, Sherman BT, Lempicki RA. Systematic and integrative analysis of large gene lists using  
400 DAVID bioinformatics resources. *Nat Protoc* 2009; **4**: 44–57.
- 401 38 Watanabe K, Taskesen E, van Bochoven A, Posthuma D. Functional mapping and annotation of  
402 genetic associations with FUMA. *Nature Communications* 2017 8:1 2017; **8**: 1–11.
- 403 39 Sherman BT, Hao M, Qiu J, Jiao X, Baseler MW, Lane HC *et al.* DAVID: a web server for functional  
404 enrichment analysis and functional annotation of gene lists (2021 update). *Nucleic Acids Res*  
405 2022. doi:10.1093/NAR/GKAC194.
- 406 40 Liao Y, Wang J, Jaehrig EJ, Shi Z, Zhang B. WebGestalt 2019: gene set analysis toolkit with  
407 revamped UIs and APIs. *Nucleic Acids Res* 2019; **47**: W199–W205.
- 408 41 Alemany S, Blok E, Jansen PR, Muetzel RL, White T. Brain morphology, autistic traits, and  
409 polygenic risk for autism: A population-based neuroimaging study. *Autism Research* 2021; **14**:  
410 2085–2099.
- 411 42 Sacco R, Gabriele S, Persico AM. Head circumference and brain size in autism spectrum disorder:  
412 A systematic review and meta-analysis. *Psychiatry Res Neuroimaging* 2015; **234**: 239–251.

- 413 43 Crucitti J, Hyde C, Enticott PG, Stokes MA. A systematic review of frontal lobe volume in autism  
414 spectrum disorder revealing distinct trajectories. *J Integr Neurosci* 2022; **21**: 57.
- 415 44 Courchesne E, Mouton PR, Calhoun ME, Semendeferi K, Ahrens-Barbeau C, Hallet MJ *et al.*  
416 Neuron number and size in prefrontal cortex of children with autism. *JAMA* 2011; **306**: 2001–  
417 2010.
- 418 45 Alemany S, Jansen PR, Muetzel RL, Marques N, El Marroun H, Jaddoe VWV *et al.* Common  
419 Polygenic Variations for Psychiatric Disorders and Cognition in Relation to Brain Morphology in  
420 the General Pediatric Population. *J Am Acad Child Adolesc Psychiatry* 2019; **58**: 600–607.
- 421 46 Piven J, Elison JT, Zylka MJ. Toward a conceptual framework for early brain and behavior  
422 development in Autism. *Mol Psychiatry* 2017; **22**: 1385–1394.
- 423 47 Estes A, Zwaigenbaum L, Gu H, St. John T, Paterson S, Elison JT *et al.* Behavioral, cognitive, and  
424 adaptive development in infants with autism spectrum disorder in the first 2 years of life. *J*  
425 *Neurodev Disord* 2015; **7**: 1–10.
- 426 48 Takahashi N, Harada T, Nishimura T, Okumura A, Choi D, Iwabuchi T *et al.* Association of Genetic  
427 Risks with Autism Spectrum Disorder and Early Neurodevelopmental Delays among Children  
428 without Intellectual Disability. *JAMA Netw Open* 2020; **3**: e1921644–e1921644.
- 429 49 Serdarevic F, Tiemeier H, Jansen PR, Alemany S, Xerxa Y, Neumann A *et al.* Polygenic Risk Scores  
430 for Developmental Disorders, Neuromotor Functioning During Infancy, and Autistic Traits in  
431 Childhood. *Biol Psychiatry* 2020; **87**: 132–138.
- 432 50 Ecker C, Bookheimer SY, Murphy DGM. Neuroimaging in autism spectrum disorder: Brain  
433 structure and function across the lifespan. *Lancet Neurol* 2015; **14**: 1121–1134.
- 434 51 Le H, Dimitrakopoulou K, Patel H, Curtis C, Cordero-Grande L, Edwards AD *et al.* Effect of  
435 schizophrenia common variants on infant brain volumes: cross-sectional study in 207 term  
436 neonates in developing Human Connectome Project. *Transl Psychiatry* 2023; **13**: 121.
- 437 52 Zhang H. Synaptic dysregulation in autism spectrum disorders. *J Neurosci Res* 2020; **98**: 2111–  
438 2114.
- 439 53 Schafer ST, Paquola ACM, Stern S, Gosselin D, Ku M, Pena M *et al.* Pathological priming causes  
440 developmental gene network heterochronicity in autistic subject-derived neurons. *Nat Neurosci*  
441 2019; **22**: 243–255.
- 442 54 Trubetskoy V, Pardiñas AF, Qi T, Panagiotaropoulou G, Awasthi S, Bigdeli TB *et al.* Mapping  
443 genomic loci implicates genes and synaptic biology in schizophrenia. *Nature* 2022; **604**: 502–508.  
444  
445

446 Figure 1. Visualisation of DrawEM parcellations. A- Visualisation of the brain regions examined in axial,  
447 coronal and sagittal views. Black outline denotes segmented brain regions. Regions found within the  
448 four cortical lobes examined in this study are coloured. B- Six axial views from inferior to posterior  
449 indicating the boundaries of the four cortical lobes. ATL – anterior temporal lobe, GPEA- gyri  
450 parahippocampalis et ambiens, STG- superior temporal gyrus, MAITG – medial and inferior temporal  
451 gyrus, LOGGF – lateral occipotemporal gyri, gyrus fusiform, CG- cingulate gyrus, FL – frontal lobe, PL –  
452 parietal lobe, OL – Occipital lobe, INSU- Insula. WM – white matter, GM – grey matter. A – Anterior, P –  
453 Posterior, S- Superior, I- Inferior, L – Left, R- Right.

454 Figure 2. Term-born European neonatal cohort. Distribution of gestational age at birth and  
455 postmenstrual age at scan of participants included in the study.

456 Figure 3. Association between PRS-PC1 and regional volumes. Left (A-C) and right (D-F) panels show  
457 scatterplots denoting correlation  $r$  and  $p$ -value between regional volumes and PRS-PC1 on y- and x- axis  
458 respectively. Values of regional volumes and PRS-PC1 have been standardized and adjusted for GA,  
459 PMA, sex, and TBV and first 3 ancestral PCs, respectively. Middle (G-I) show brain regions overlapped  
460 with values of PRS-PC1 beta coefficient in the linear regression model, where blue and red values  
461 indicate negative and positive direction of effect; S- superior, I- Inferior, A-anterior, P-posterior, L-left, R-  
462 right.

463 Figure 4. Gene set-enrichment analysis. A) Visualisation of the total SNPs examined in this study and  
464 number of SNPs and genes determined as associated with three phenotypes of interest B) Heatmap of  
465 genes involved in biological pathways enriched and specific (found in less than 5% across all random  
466 simulations) to the neuroimaging phenotypes of interest. Bar plot showing pathway enrichment p-value  
467 after Bonferroni correction and proportion of gene overlapped with the gene list. GOCC: Gene ontology  
468 cellular components. GOBP: Gene ontology biological pathways.

469 Table 1. Demography of European neonatal cohort included in this study.

|                                       |              |
|---------------------------------------|--------------|
| Individuals                           | 273          |
| Female/Male                           | 133/140      |
| GA (weeks)                            | 40.16±1.22   |
| PMA (weeks)                           | 41.75±1.66   |
| Total Brain Volume (mm <sup>3</sup> ) | 380251±49469 |
| Birth weight (kg)                     | 3.48±0.47    |

470

**A**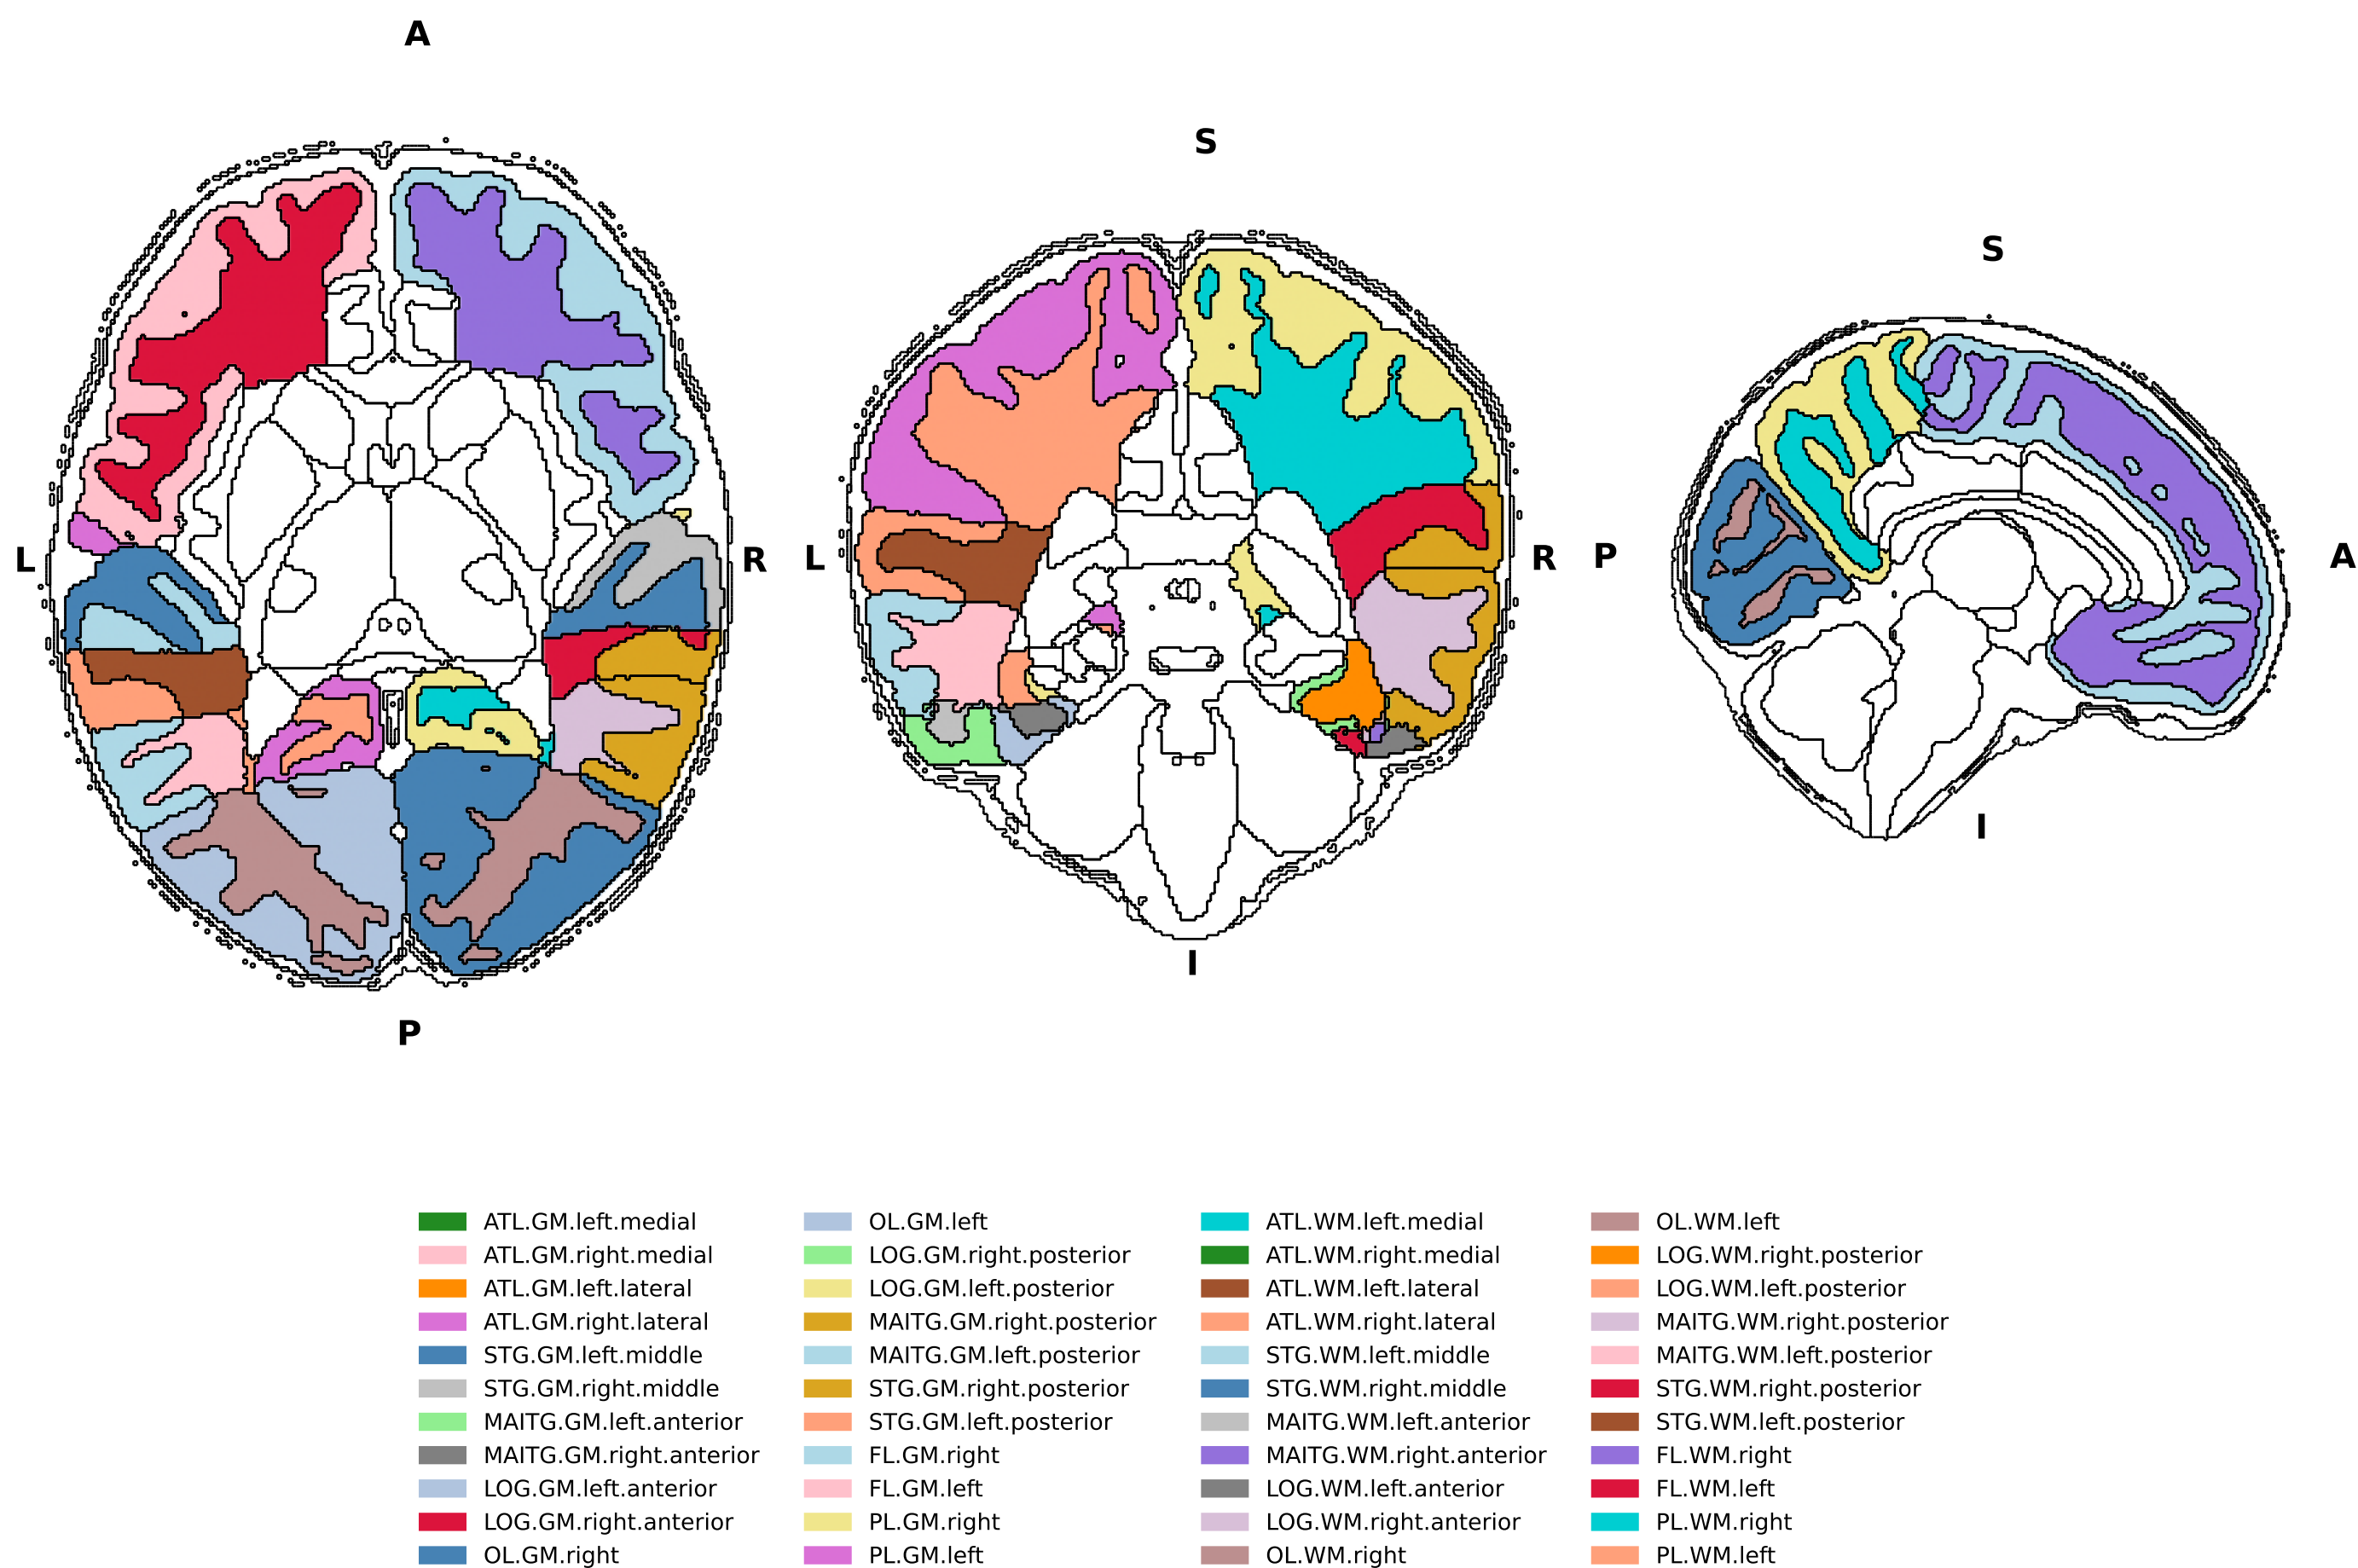**B**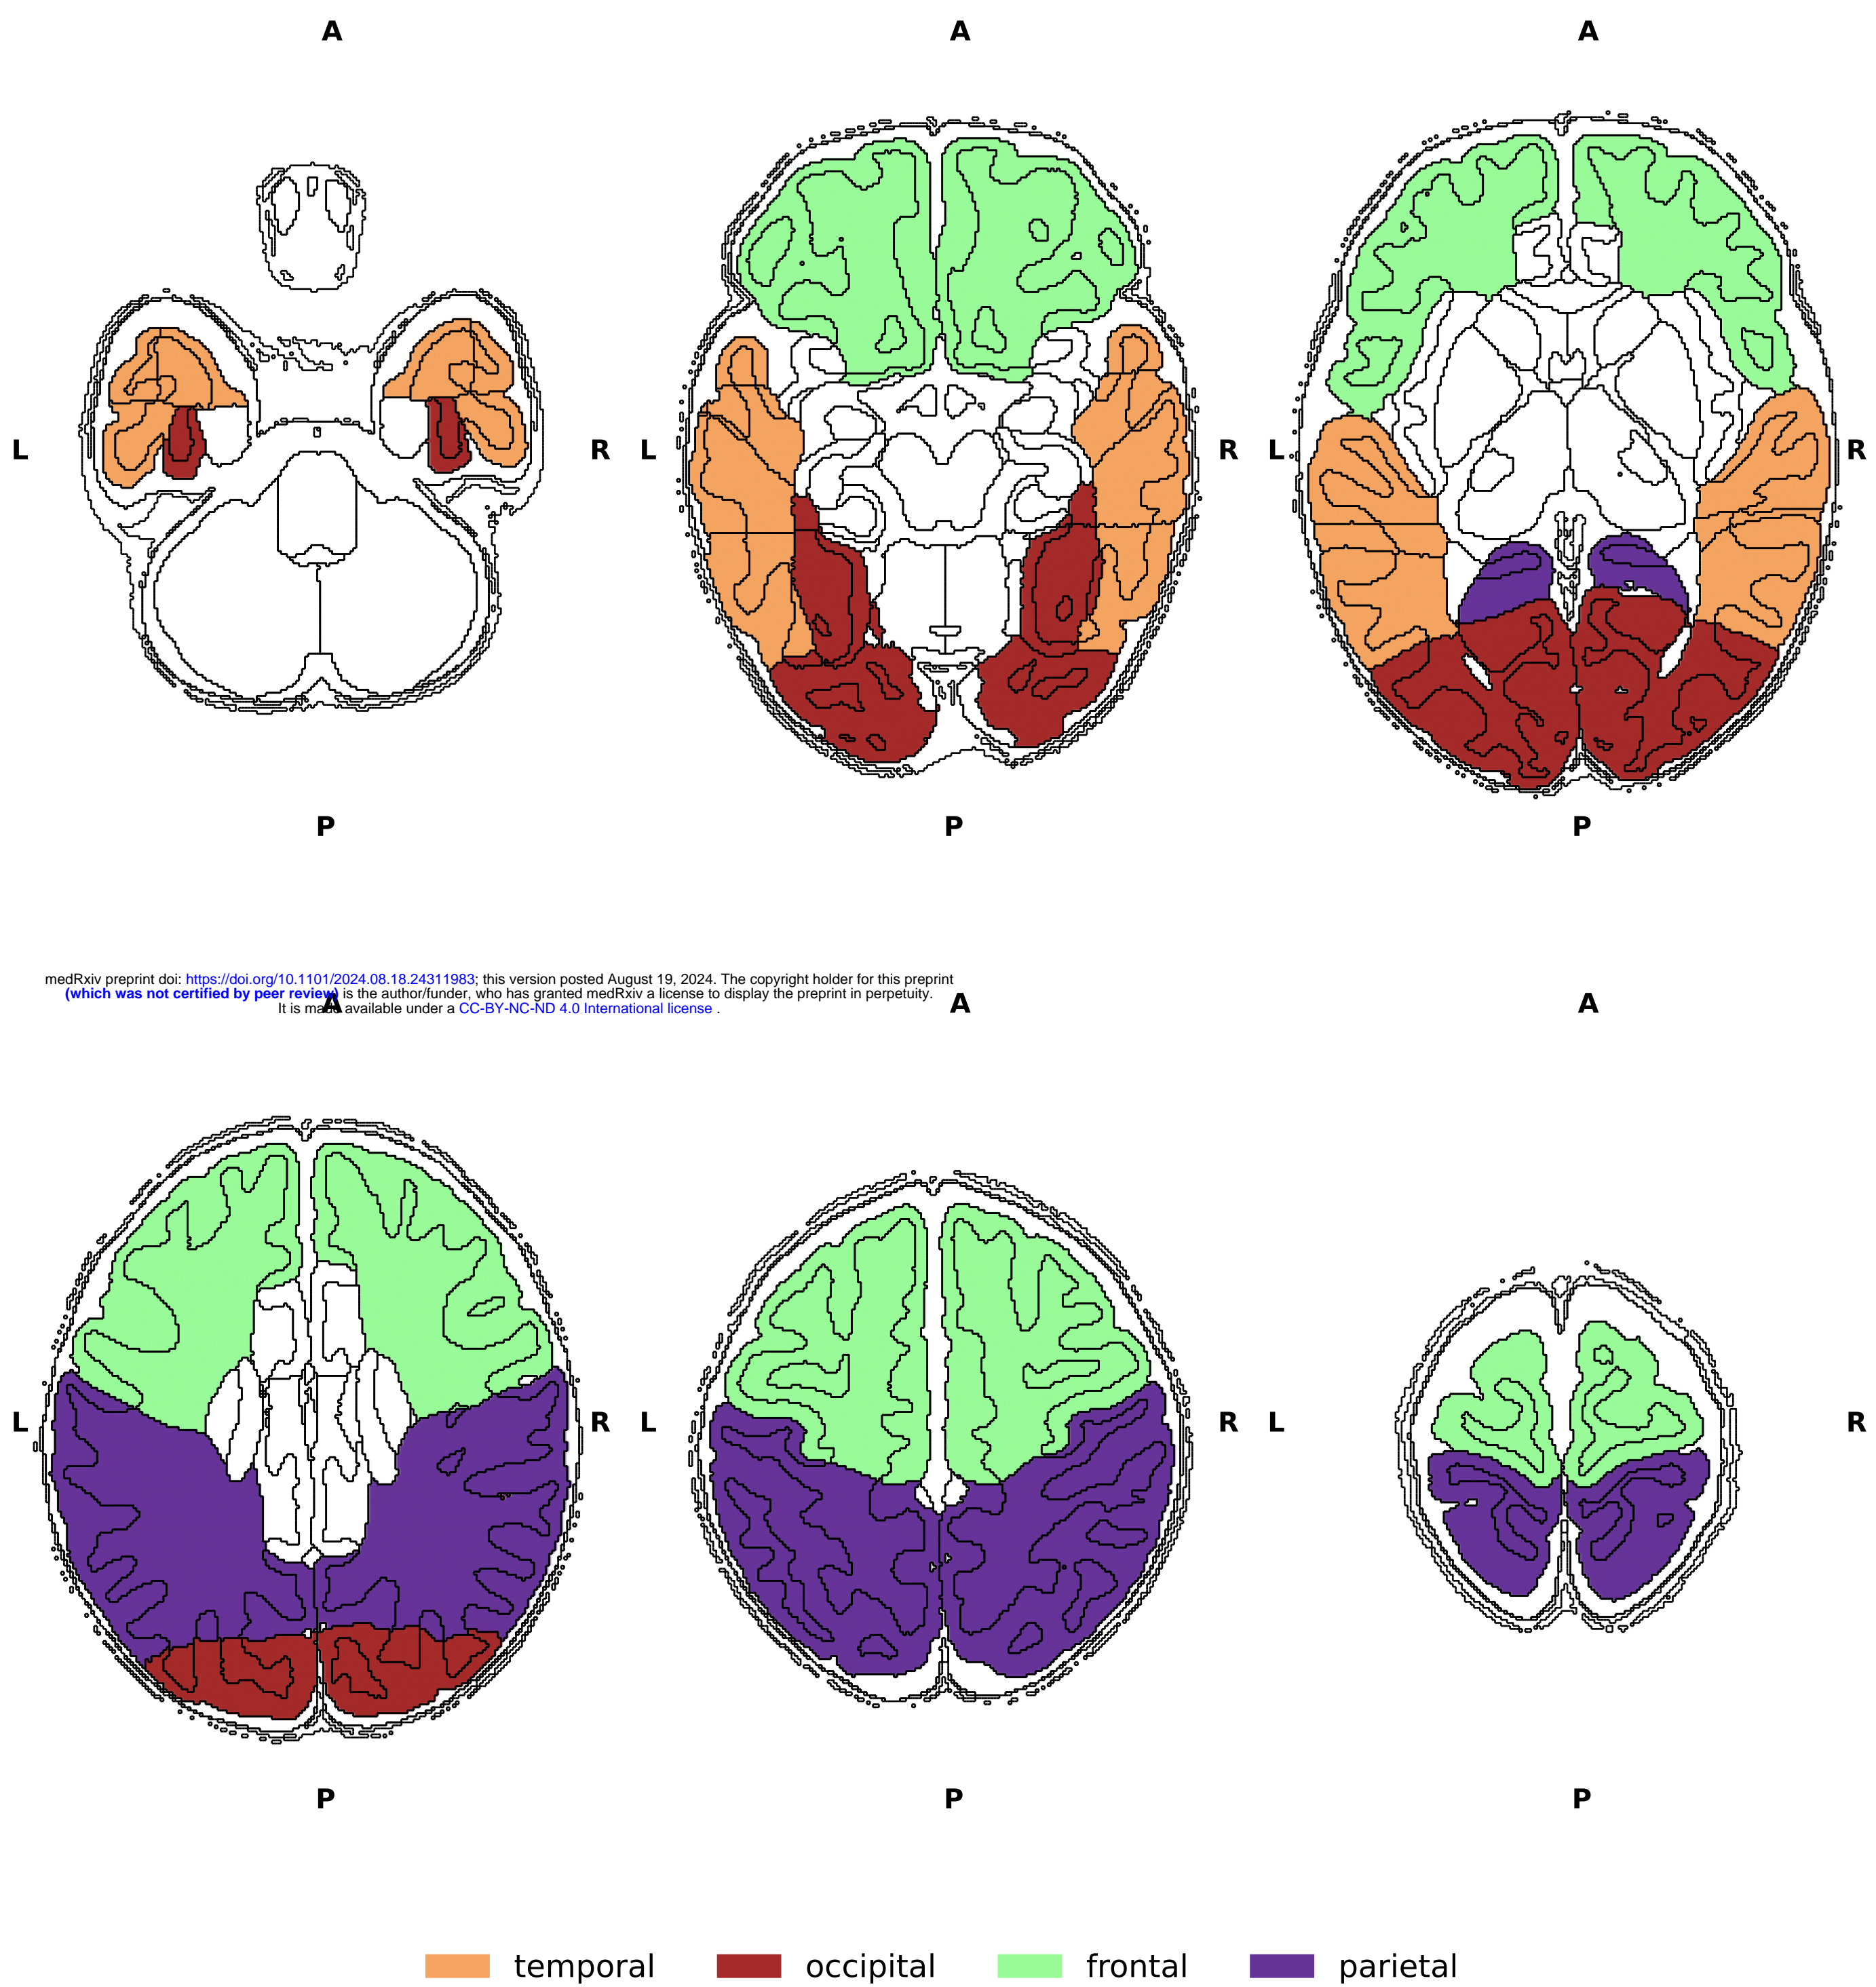

Gestational age at birth

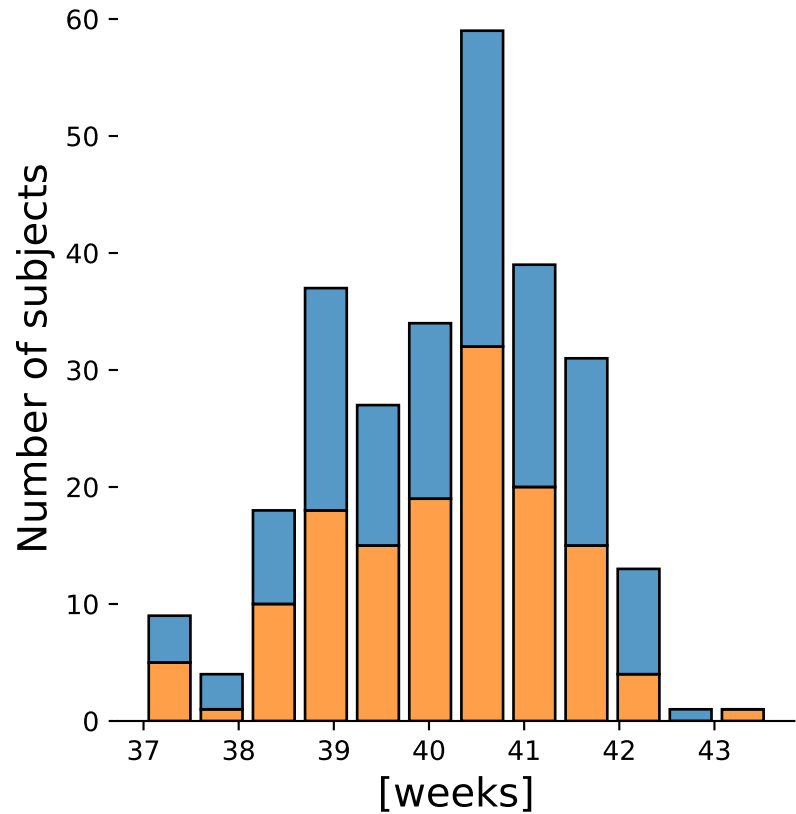

Postmenstrual age at scan

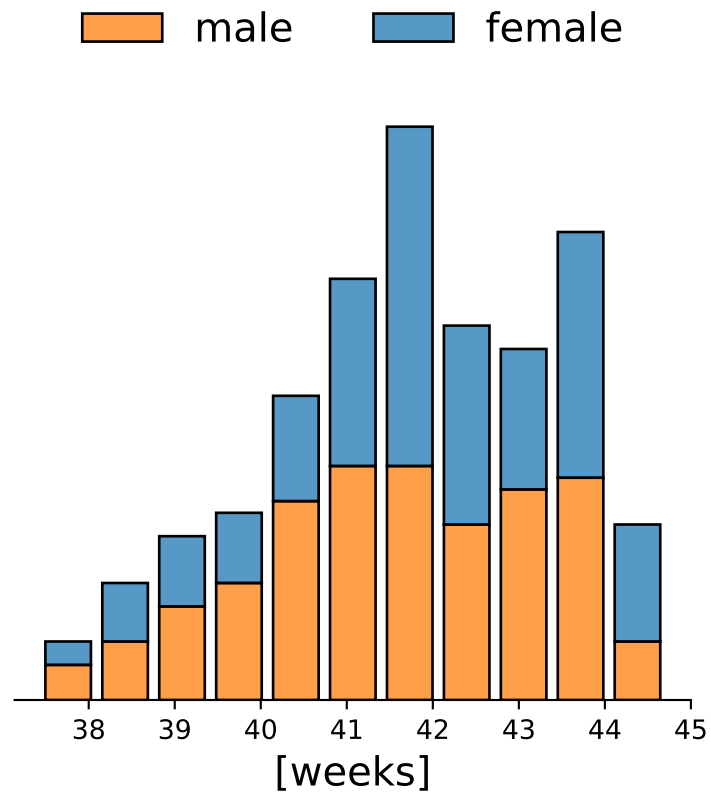



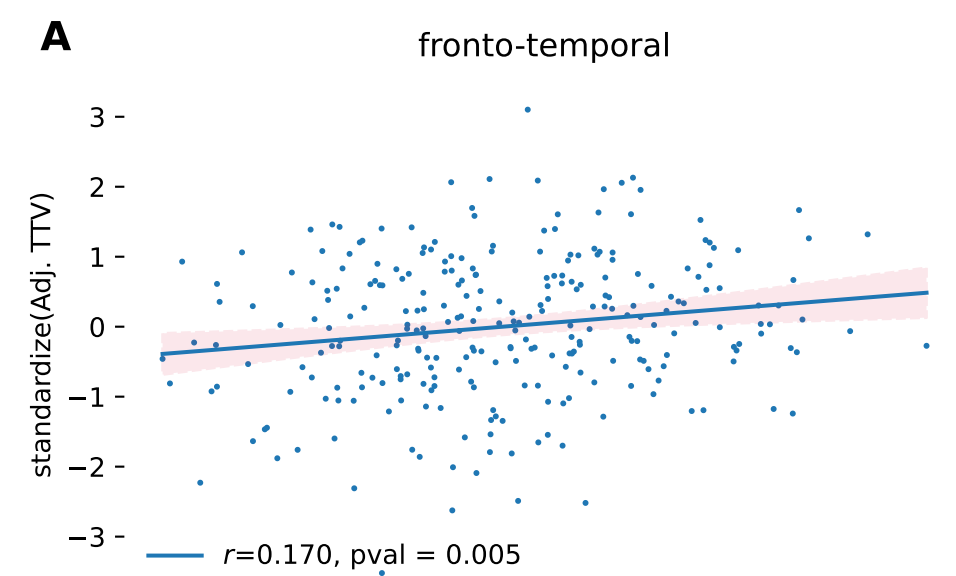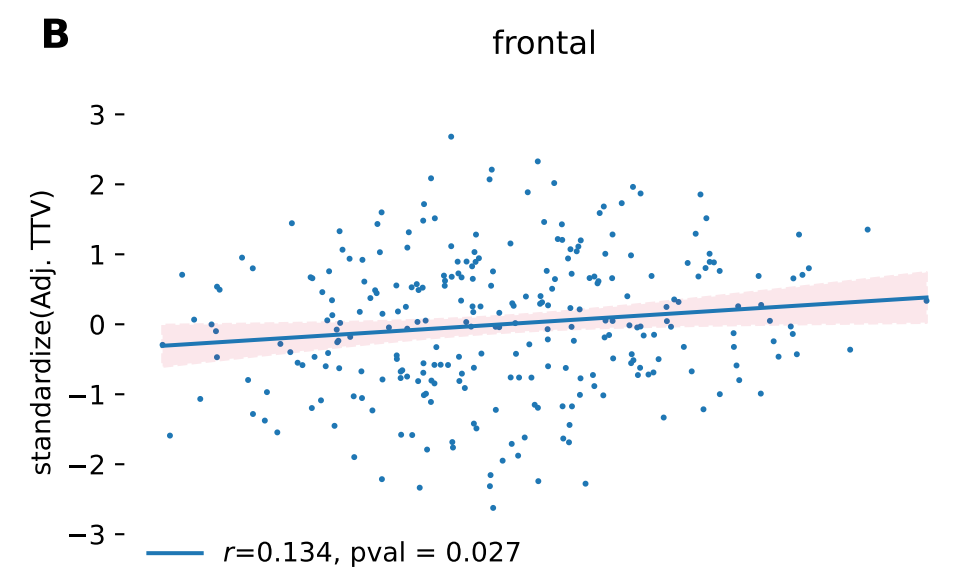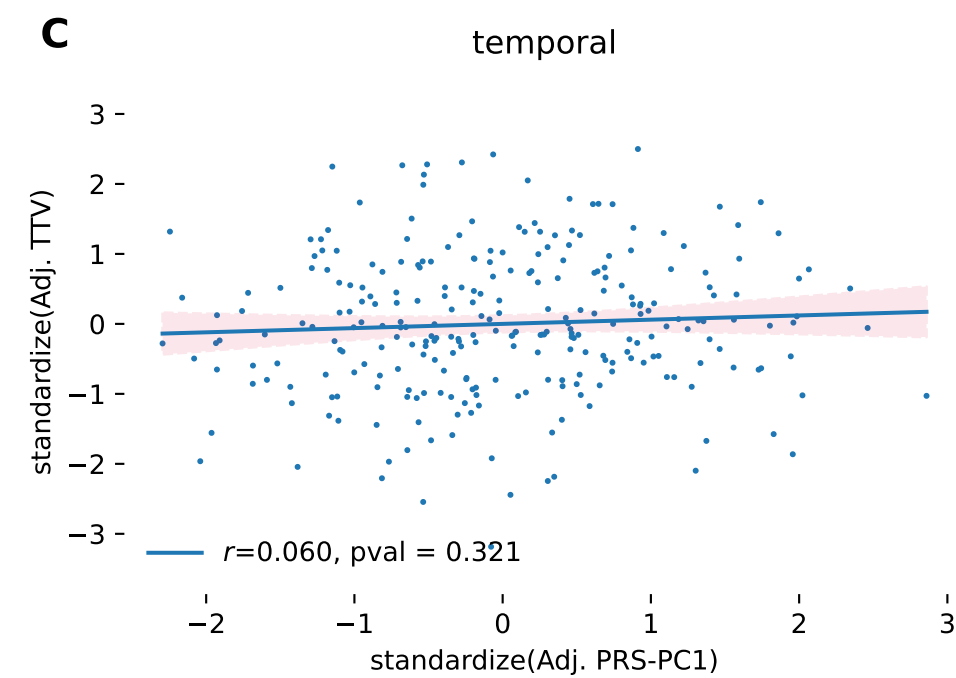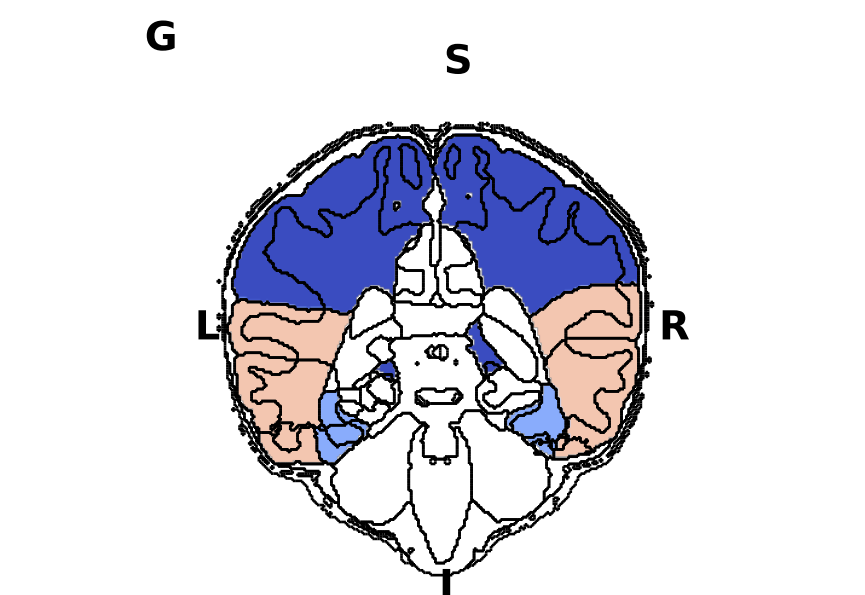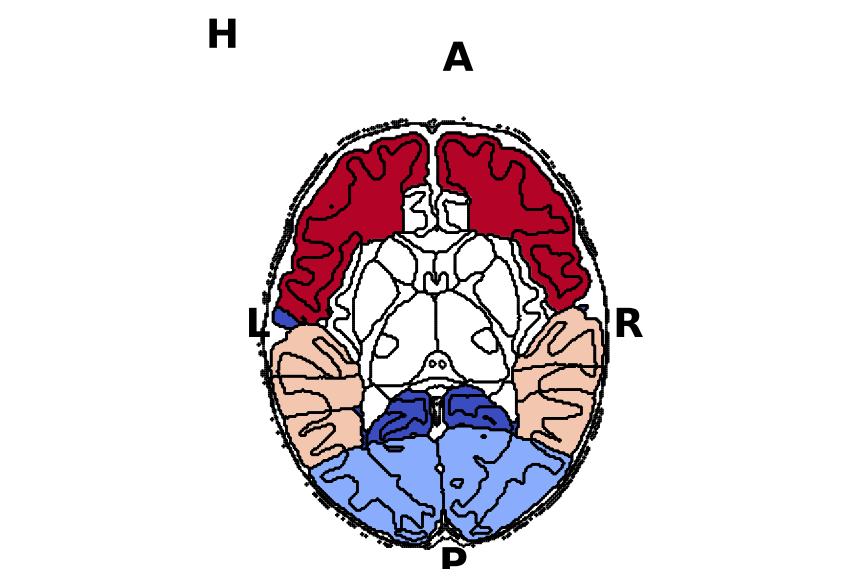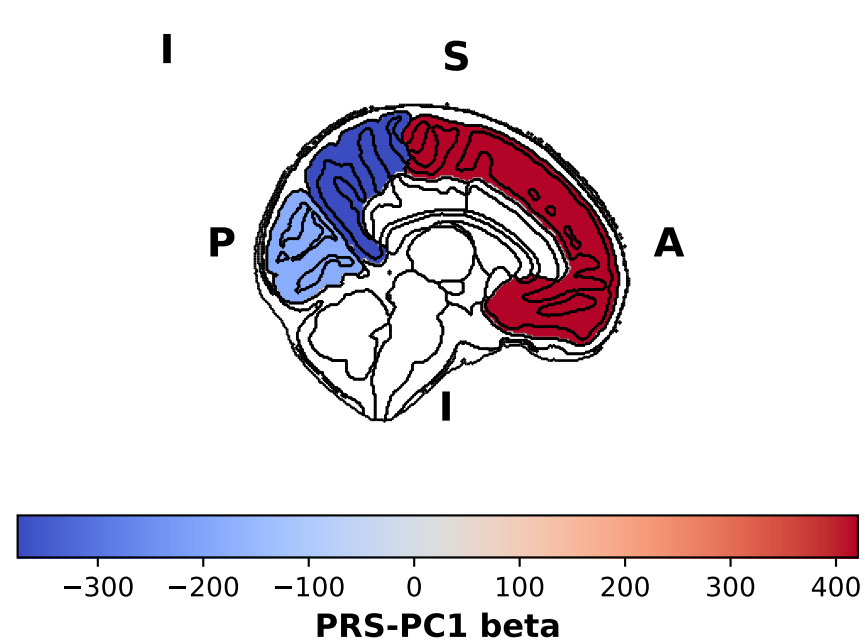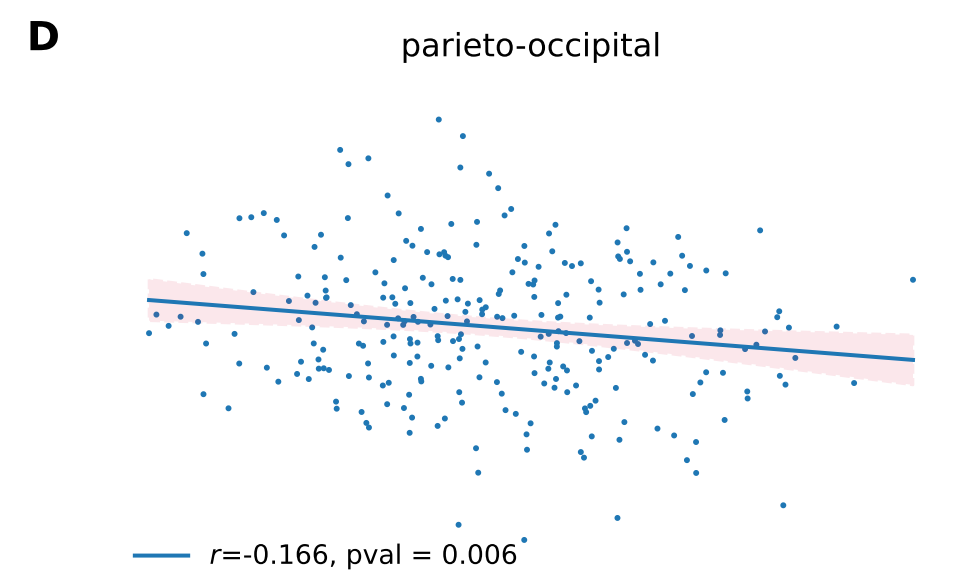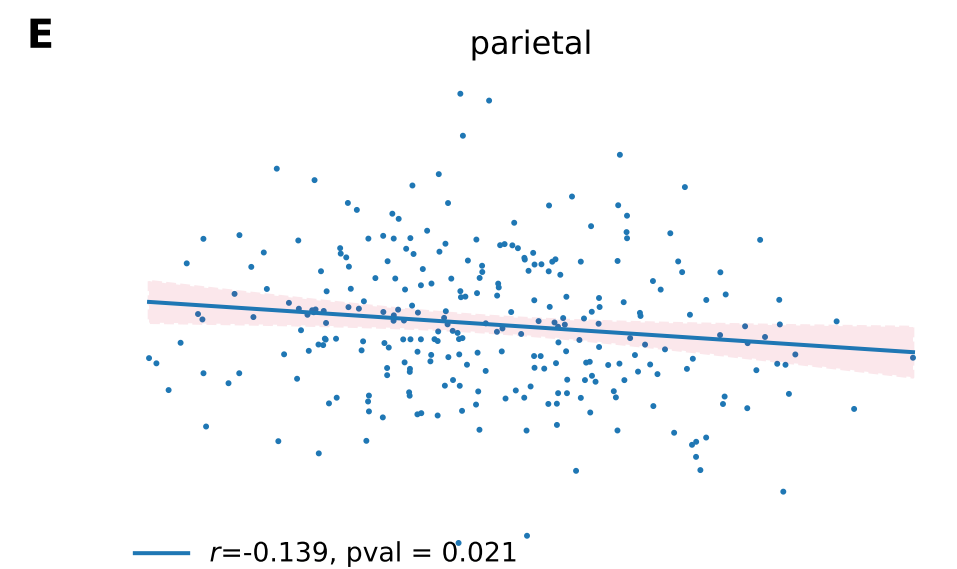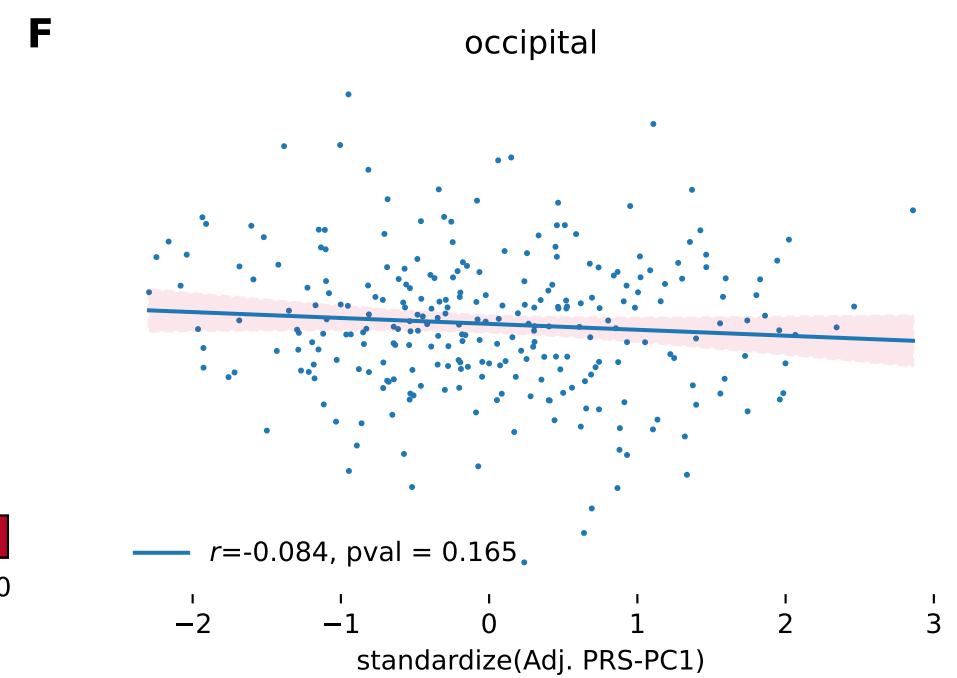

**A**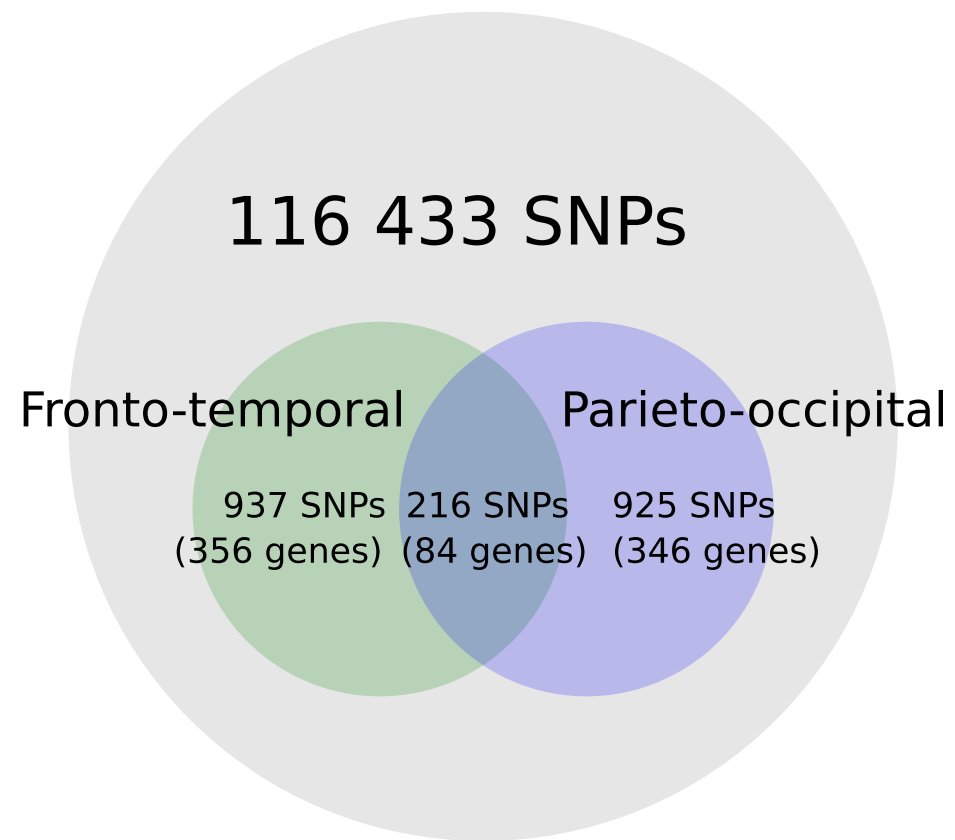**B**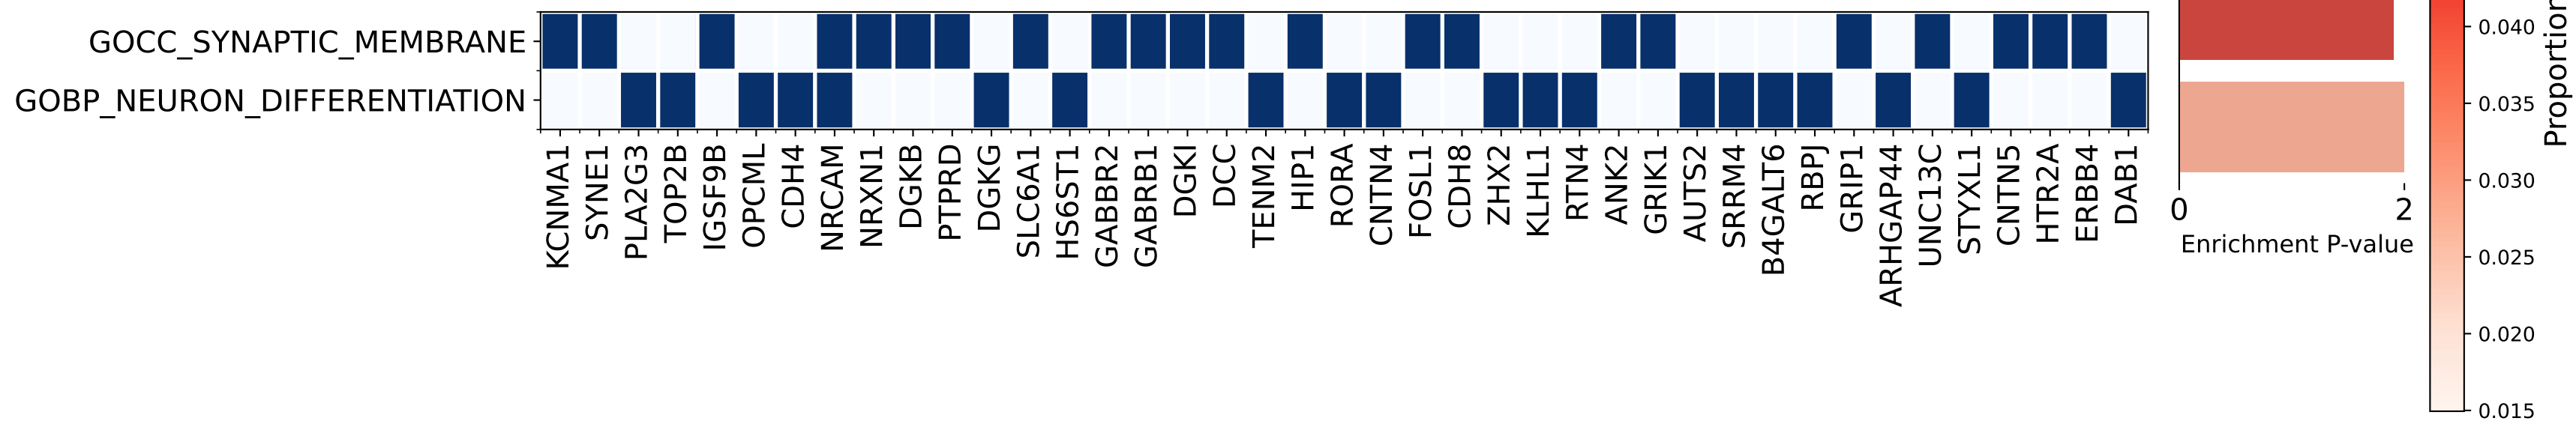

Source: https://medrxiv.org/content/10.1101/2024.08.18.24311983.full.pdf
